# Supplementary material for: Service disruptions, trauma and burnout during the COVID-19 pandemic among healthcare providers delivering immunisation and maternal and child health services in Indonesia
Source: PubMed Central journal article supplement — BMJ Glob Health. 2024 Jun 30;9(6):e014318. doi: 10.1136/bmjgh-2023-014318 (PMC11216070; doi:10.1136/bmjgh-2023-014318), 2024-06-30
Supplement: bmjgh-2023-014318supp001.pdf [file bmjgh-2023-014318supp001.pdf]

## Impact of COVID-19 on immunisation and maternal child health services in Indonesia

### Survey for healthcare workers

|     | DATA COLLECTION GENERAL INFORMATION                                                                                                                                                       | Answer Code  |
|-----|-------------------------------------------------------------------------------------------------------------------------------------------------------------------------------------------|--------------|
| A1  | Province<br>1. Central Java<br>2. West Nusa Tenggara                                                                                                                                      | [ ]          |
| A2  | District<br>1. Semarang City<br>2. Demak District<br>3. Purbalingga District<br>4. Surakarta City<br>5. Mataram City<br>6. Central Lombok District<br>7. Sumbawa District<br>8. Bima City | [ ]          |
| A3  | Subdistrict<br>See code list for subdistricts                                                                                                                                             | [ ][ ]       |
| A4  | Village<br>See code list for villages                                                                                                                                                     | [ ][ ]       |
| A5  | Health Facility Type<br>1. Posyandu<br>2. Puskesmas/Pustu<br>3. Clinic<br>4. Independent midwife practice<br>5. Hospital<br>6. Other, specify                                             | [ ]          |
| A6  | Selected respondent number                                                                                                                                                                | [ ][ ]       |
| A7  | Unique interview ID                                                                                                                                                                       | [ ][ ]       |
| A8  | Substitute respondent                                                                                                                                                                     | [ ]yes [ ]no |
| A9  | Interview date                                                                                                                                                                            | __/__/__     |
| A10 | Interview start time                                                                                                                                                                      | __ __        |
| A11 | Interview finish time                                                                                                                                                                     | __ __        |
| A12 | Interviewer name                                                                                                                                                                          |              |
| A13 | Interviewer Initials                                                                                                                                                                      |              |
|     | CHECKING STATUS AND DATA ENTRY                                                                                                                                                            |              |
| B1  | Checking date by field coordinator                                                                                                                                                        | __/__/__     |
| B2  | Field coordinator name                                                                                                                                                                    |              |
| B3  | Field coordinator initials                                                                                                                                                                |              |
| B4  | Date of data entry                                                                                                                                                                        | __/__/__     |
| B5  | Data entry officer initials                                                                                                                                                               |              |

|  | Section 1: Demographics | Response code |
|--|-------------------------|---------------|
|--|-------------------------|---------------|

|    |                                                                                                                                                                                                                                                                                                                                                                                       |     |
|----|---------------------------------------------------------------------------------------------------------------------------------------------------------------------------------------------------------------------------------------------------------------------------------------------------------------------------------------------------------------------------------------|-----|
| C0 | Could you tell me your name, for the purposes of this interview?                                                                                                                                                                                                                                                                                                                      |     |
| C1 | Gender of respondent <i>[interviewer to observe only]</i><br>1. Female<br>2. Male                                                                                                                                                                                                                                                                                                     | [ ] |
| C2 | How old are you?<br><input type="text"/> <input type="text"/> years                                                                                                                                                                                                                                                                                                                   | [ ] |
| C3 | C3. What is your highest level of education?<br>1. Completed high school<br>2. Completed a diploma (D3)<br>3. Completed diploma (D4)<br>4. Undergraduate degree<br>5. Profession degree<br>6. Masters<br>7. PhD                                                                                                                                                                       | [ ] |
| C4 | What is your current role?<br>1. Doctor<br>2. Nurse<br>3. Midwife<br>4. Allied health<br>5. Community health worker/village midwife<br>6. Traditional healer<br>7. Other, specify                                                                                                                                                                                                     | [ ] |
| C5 | How many years have you worked in this professional role?<br>1. Less than 2 years<br>2. Between 2 and less than 5 years<br>3. Between 5 and less than 10 years<br>4. 10 years or more                                                                                                                                                                                                 | [ ] |
| C6 | What health facility do you primarily work in?<br>1. Puskesmas ( <i>continue to C7</i> )<br>2. Poskesdes ( <i>continue to C7</i> )<br>3. Polindes ( <i>continue to C7</i> )<br>4. Pustu ( <i>continue to C7</i> )<br>5. Independent midwife practice ( <i>continue to C7</i> )<br>6. Private clinic ( <i>continue to C7 &amp; C8</i> )<br>7. Other, specify ( <i>continue to C7</i> ) | [ ] |
| C7 | Do you work in any other health facility?<br><i>[Can have more than one response. Mark (write the number 1 on all the answers mentioned by the respondent). The interviewer MUST NOT read out the answer options, but select the option mentioned which is closest]</i>                                                                                                               |     |
|    | A. No                                                                                                                                                                                                                                                                                                                                                                                 | A.  |
|    | B. Yes, Puskesmas                                                                                                                                                                                                                                                                                                                                                                     | B.  |
|    | C. Yes, Poskesdas                                                                                                                                                                                                                                                                                                                                                                     | C.  |
|    | D. Yes, Pustu                                                                                                                                                                                                                                                                                                                                                                         | D.  |

|                                                                                                                                         |                                                                                                                                                                                                                                                                                                                                                                                                                                                                              |     |
|-----------------------------------------------------------------------------------------------------------------------------------------|------------------------------------------------------------------------------------------------------------------------------------------------------------------------------------------------------------------------------------------------------------------------------------------------------------------------------------------------------------------------------------------------------------------------------------------------------------------------------|-----|
|                                                                                                                                         | E. Yes, independent midwife practice                                                                                                                                                                                                                                                                                                                                                                                                                                         | E.  |
|                                                                                                                                         | F. Yes, private clinic                                                                                                                                                                                                                                                                                                                                                                                                                                                       | F.  |
|                                                                                                                                         | G. Other, specify                                                                                                                                                                                                                                                                                                                                                                                                                                                            | G.  |
| C8                                                                                                                                      | <p><i>[If respondent answered 'Yes' for private clinic in C6 OR C7, ask the question below. If the respondent does not work in a private clinic continue to C9]</i></p> <p>How would you describe the private clinic you work in. Is it:<br/> <i>[Can have more than one response. Mark (write the number 1 on all the answers mentioned by the respondent). The interviewer MUST NOT read out the answer options, but select the option mentioned which is closest]</i></p> |     |
|                                                                                                                                         | A. Not for profit - Religiously affiliated                                                                                                                                                                                                                                                                                                                                                                                                                                   | A.  |
|                                                                                                                                         | B. Not for profit – not religiously affiliated                                                                                                                                                                                                                                                                                                                                                                                                                               | B.  |
|                                                                                                                                         | C. For profit                                                                                                                                                                                                                                                                                                                                                                                                                                                                | C.  |
|                                                                                                                                         | D. Other, specify                                                                                                                                                                                                                                                                                                                                                                                                                                                            | D.  |
|                                                                                                                                         | E. Don't know                                                                                                                                                                                                                                                                                                                                                                                                                                                                | E.  |
| C9                                                                                                                                      | <p>Which health services do you support?<br/> <i>[Can have more than one response. Mark (write the number 1 on all the answers mentioned by the respondent). The interviewer MUST NOT read out the answer options, but select the option mentioned which is closest]</i></p>                                                                                                                                                                                                 |     |
|                                                                                                                                         | A. Routine child Immunization                                                                                                                                                                                                                                                                                                                                                                                                                                                | A.  |
|                                                                                                                                         | B. COVID-19 Immunization                                                                                                                                                                                                                                                                                                                                                                                                                                                     | B.  |
|                                                                                                                                         | C. Antenatal care                                                                                                                                                                                                                                                                                                                                                                                                                                                            | C.  |
|                                                                                                                                         | D. Labor and birth                                                                                                                                                                                                                                                                                                                                                                                                                                                           | D.  |
|                                                                                                                                         | E. Postnatal care                                                                                                                                                                                                                                                                                                                                                                                                                                                            | E.  |
|                                                                                                                                         | F. Family planning                                                                                                                                                                                                                                                                                                                                                                                                                                                           | F.  |
|                                                                                                                                         | G. Baby and child services (weighing, vitamin A supplementation, etc)                                                                                                                                                                                                                                                                                                                                                                                                        | G.  |
|                                                                                                                                         | H. Other, specify                                                                                                                                                                                                                                                                                                                                                                                                                                                            | H.  |
| <b>Section 2: Impact of COVID-19 on Routine Immunisation and MCH services</b>                                                           |                                                                                                                                                                                                                                                                                                                                                                                                                                                                              |     |
| <b><i>If the respondent did not select 'routine child immunisation' or 'COVID-19 immunisation' in Section 1, C9, proceed to D8.</i></b> |                                                                                                                                                                                                                                                                                                                                                                                                                                                                              |     |
| D1                                                                                                                                      | <p>Do you have systems in place to track people who miss out on routine vaccines or defaulters?</p> <p>1. No<br/>2. Yes<br/>3. Not sure</p>                                                                                                                                                                                                                                                                                                                                  | [ ] |
| D2                                                                                                                                      | <p>In the past year have you had a stock-out of any routine vaccines?</p> <p>1. No (<i>skip to D4</i>)<br/>2. Yes (<i>continue to D3</i>)<br/>3. Not sure (<i>skip to D4</i>)</p>                                                                                                                                                                                                                                                                                            | [ ] |

|    |                                                                                                                                                                                                                                                                                                     |     |
|----|-----------------------------------------------------------------------------------------------------------------------------------------------------------------------------------------------------------------------------------------------------------------------------------------------------|-----|
| D3 | Which vaccines have been stocked out?<br><i>[Can have more than one response. Mark (write the number 1 on all the answers mentioned by the respondent). The interviewer MUST NOT read out the answer options, but select the option mentioned which is closest]</i>                                 |     |
|    | A. BCG                                                                                                                                                                                                                                                                                              | A.  |
|    | B. HepB                                                                                                                                                                                                                                                                                             | B.  |
|    | C. OPV                                                                                                                                                                                                                                                                                              | C.  |
|    | D. IPV                                                                                                                                                                                                                                                                                              | D.  |
|    | E. Pentavalent (DPT-HB-Hib)                                                                                                                                                                                                                                                                         | E.  |
|    | F. PCV                                                                                                                                                                                                                                                                                              | F.  |
|    | G. MMR/MR                                                                                                                                                                                                                                                                                           | G.  |
|    | H. Other, specify                                                                                                                                                                                                                                                                                   | H.  |
| D4 | In the past year have you had a stock out of any injection equipment?<br><i>[Can have more than one response. Mark (write the number 1 on all the answers mentioned by the respondent). The interviewer MUST NOT read out the answer options, but select the option mentioned which is closest]</i> |     |
|    | A. No                                                                                                                                                                                                                                                                                               | A.  |
|    | B. Yes, syringes                                                                                                                                                                                                                                                                                    | B.  |
|    | C. Yes, needles                                                                                                                                                                                                                                                                                     | C.  |
|    | D. Yes, diluent                                                                                                                                                                                                                                                                                     | D.  |
|    | E. Don't know                                                                                                                                                                                                                                                                                       | E.  |
| D5 | Apart from your basic professional training, have you had any formal training in immunisation?<br>1. No<br>2. Yes                                                                                                                                                                                   | [ ] |
| D6 | Do you have a copy of the standard operating procedure for routine immunisation in your clinic?<br>1. No<br>2. Yes<br>3. Don't know                                                                                                                                                                 | [ ] |
| D7 | If required, would it bother you to give more than one injection during a vaccine encounter?<br>1. No<br>2. Yes                                                                                                                                                                                     | [ ] |
| D8 | In the facility that you primarily work in (service mentioned earlier), did you experience any of the following disruptions due to COVID-19?                                                                                                                                                        |     |

|    |                                                                                                                                                                    |     |
|----|--------------------------------------------------------------------------------------------------------------------------------------------------------------------|-----|
|    | 8a. Closure of the service<br>1. No<br>2. Yes<br>3. Don't know                                                                                                     | [ ] |
|    | 8b. Lockdowns hindering access to the service for parents or caregivers<br>1. No<br>2. Yes<br>3. Don't know                                                        | [ ] |
|    | 8c. Fewer parents/caregivers presenting to service for reasons other than lockdown<br>1. No<br>2. Yes<br>3. Don't know                                             | [ ] |
|    | 8d. Not enough staff to provide services<br>1. No<br>2. Yes<br>3. Don't know                                                                                       | [ ] |
|    | 8e. Staff deployed to provide COVID-19 relief<br>1. No<br>2. Yes<br>3. Don't know                                                                                  | [ ] |
|    | 8f. Insufficient personal protective equipment (PPE) available for health care providers to provide services<br>1. No<br>2. Yes<br>3. Don't know                   | [ ] |
|    | 8g. Unavailability/stock out of vaccines or injecting equipment at service<br>1. No<br>2. Yes<br>3. Don't know                                                     | [ ] |
|    | 8h. Changes in policies for who can be vaccinated<br>1. No<br>2. Yes<br>3. Don't know                                                                              | [ ] |
|    | 8i. Others (please specify what are the other causes of this disruption and/or changes in service utilization):                                                    |     |
| D9 | In the facility that you primarily work in (service mentioned earlier), what approaches were used to overcome the disruptions due to COVID-19?<br>Did you see..... |     |
|    | 9a. Task shifting / role delegation<br>1. No<br>2. Yes<br>3. Don't know                                                                                            | [ ] |
|    | 9b. Redirection of parents or caregivers to alternative health care facilities<br>1. No<br>2. Yes                                                                  | [ ] |

|                            |                                                                                                                                                                                                                                                                                 |     |
|----------------------------|---------------------------------------------------------------------------------------------------------------------------------------------------------------------------------------------------------------------------------------------------------------------------------|-----|
|                            | 3. Don't know                                                                                                                                                                                                                                                                   |     |
|                            | 9c. Community outreach to explain service disruptions and changes<br>1. No<br>2. Yes<br>3. Don't know                                                                                                                                                                           | [ ] |
|                            | 9d. Patients or caregivers seen outdoors from the facility<br>1. No<br>2. Yes<br>3. Don't know                                                                                                                                                                                  | [ ] |
|                            | 9e. Government removal of user fees<br>1. No<br>2. Yes<br>3. Don't know                                                                                                                                                                                                         | [ ] |
|                            | 9f. Phone calls to patients or caregivers<br>1. No<br>2. Yes<br>3. Don't know                                                                                                                                                                                                   | [ ] |
|                            | 9g. Others, describe what other approaches are being used                                                                                                                                                                                                                       | [ ] |
| <b>Section 3: COVID-19</b> |                                                                                                                                                                                                                                                                                 |     |
| E1                         | Have you ever had COVID-19?<br>1. No ( <i>skip to E6</i> )<br>2. Yes ( <i>continue to E2</i> )<br>3. Not sure ( <i>skip to E6</i> )                                                                                                                                             | [ ] |
| E2                         | In your opinion, based on the symptoms you suffered/felt, was it mild, moderate or severe?<br>1. Mild<br>2. Moderate<br>3. Severe<br>4. Not Sure                                                                                                                                | [ ] |
| E3                         | Was it confirmed by a test?<br>1. Confirmed by a test ( <i>continue to E4</i> )<br>2. Not confirmed by a test ( <i>Skip to E5</i> )                                                                                                                                             | [ ] |
| E4                         | If confirmed by tests, what tests were performed?<br><i>[Can have more than one response. Mark (write the number 1 on all the answers mentioned by the respondent). The interviewer MUST NOT read out the answer options, but select the option mentioned which is closest]</i> |     |
|                            | A. PCR test                                                                                                                                                                                                                                                                     | A.  |
|                            | B. Antigen test                                                                                                                                                                                                                                                                 | B.  |
|                            | C. Antibody test                                                                                                                                                                                                                                                                | C.  |
|                            | D. Other, specify                                                                                                                                                                                                                                                               | D.  |
|                            | E. Don't know                                                                                                                                                                                                                                                                   | E.  |
| E5                         | Were you hospitalized?<br>1. No<br>2. Yes                                                                                                                                                                                                                                       | [ ] |

|      |                                                                                                                                                                                                                                                                                                                             |     |
|------|-----------------------------------------------------------------------------------------------------------------------------------------------------------------------------------------------------------------------------------------------------------------------------------------------------------------------------|-----|
| E6   | Has anyone you know had COVID-19?<br>1.. No<br>2. Yes, family only<br>3. Yes, other people only (not family)<br>4. Yes, family and other people<br>5. Not sure                                                                                                                                                              | [ ] |
| E7   | Do you know where to go to get a COVID-19 vaccine for yourself?<br>1. No<br>2. Yes                                                                                                                                                                                                                                          | [ ] |
| E8   | Have you received a COVID-19 vaccine? Would you say...<br>1. No ( <i>skip to E11</i> )<br>2. Yes, you received one dose ( <i>continue to E9</i> )<br>3. Yes, your received two doses ( <i>continue to E9</i> )<br>4. Yes, you received three or more doses? ( <i>continue to E9</i> )<br>5. Not sure ( <i>skip to E11</i> ) | [ ] |
| E9   | Do you still need another dose of COVID-19 vaccine? Would you say...<br>1. No, you do <u>not</u> need another dose<br>2. Yes, you do need another dose or doses<br>3. Not sure                                                                                                                                              | [ ] |
| E10  | Do you have a vaccine card/certificate?<br>1. Yes, showable (peduli lindungi/card) ( <i>ask to view the card</i> )<br>2. Yes, but can't be shown<br>3. No                                                                                                                                                                   | [ ] |
| E11  | <i>[If respondent is not vaccinated – see E8]</i> Do you want to get a COVID-19 vaccine? Would you say...<br>1. No, you do not want to<br>2. Yes, you do want to, or are you<br>3. Not sure                                                                                                                                 | [ ] |
| E12  | Do you think most of your close family and friends would want you to get a COVID-19 vaccine?<br>1. No<br>2. Yes                                                                                                                                                                                                             | [ ] |
| E13a | How easy is it to get a COVID vaccine for yourself? Would you say...<br>1. Not at all easy<br>2. A little easy<br>3. Moderately easy<br>4. Very easy                                                                                                                                                                        | [ ] |
| E13b | What makes it hard for you to get a COVID-19 vaccine? Would you say...<br><i>[Can have more than one response. Mark (write the number 1 on all the answers mentioned by the respondent). The interviewer may read out the answer options]</i>                                                                               |     |
|      | A. COVID-19 vaccination is not yet available for me                                                                                                                                                                                                                                                                         | A.  |
|      | B. Making an appointment is hard                                                                                                                                                                                                                                                                                            | B.  |
|      | C. I can't go on my own (I have a physical limitation)                                                                                                                                                                                                                                                                      | C.  |
|      | D. The vaccination site is hard to get to                                                                                                                                                                                                                                                                                   | D.  |
|      | E. The opening times are inconvenient                                                                                                                                                                                                                                                                                       | E.  |

|     |                                                                                                                                                                                                                                                                                                               |     |
|-----|---------------------------------------------------------------------------------------------------------------------------------------------------------------------------------------------------------------------------------------------------------------------------------------------------------------|-----|
|     | F. Sometimes people are turned away without vaccination                                                                                                                                                                                                                                                       | F.  |
|     | G. The waiting time takes too long                                                                                                                                                                                                                                                                            | G.  |
|     | H. Something else, specify                                                                                                                                                                                                                                                                                    | H.  |
|     | I. Nothing. It's not hard                                                                                                                                                                                                                                                                                     | I.  |
| E14 | How cheap is it to pay for COVID-19 vaccination? When you think about the cost, please consider any payments to the clinic, the cost of getting there, plus the cost of taking time away from work. Would you say...<br>1. Not at all cheap<br>2. A little easy cheap<br>3. Moderately cheap<br>4. Very cheap | [ ] |
| E15 | How concerned are you about getting COVID-19? Would you say...<br>1. Not at all concerned<br>2. A little concerned<br>3. Moderately concerned<br>4. Very concerned                                                                                                                                            | [ ] |
| E16 | How concerned are you about your patients getting COVID-19 from you? Would you say...<br>1. Not at all concerned<br>2. A little concerned<br>3. Moderately concerned<br>4. Very concerned                                                                                                                     | [ ] |
| E17 | How important do you think getting a COVID-19 vaccination will be for your health? Would you say...<br>1. Not at all important<br>2. A little important<br>3. Moderately important<br>4. Very important                                                                                                       | [ ] |
| E18 | How confident are you that you could answer patient questions about getting a COVID-19 vaccine? Would you say...<br>1. Not at all confident<br>2. A little confident<br>3. Moderately confident<br>3. Very confident                                                                                          | [ ] |
| E19 | In the last year, have you seen or heard anything that made you worry about the COVID-19 vaccine?<br>1. No<br>2. Yes                                                                                                                                                                                          | [ ] |
| E20 | Have you encountered information on COVID-19 where you found it hard to decide whether it was right or wrong? For example, information about ways to prevent the disease or to recover?<br>1. No ( <i>skip to E22</i> )<br>2. Yes ( <i>continue to E21</i> )                                                  | [ ] |
| E21 | Where did you see or hear this information?<br><i>[Can have more than one response. Mark (write the number 1 on all the answers mentioned by the respondent). The interviewer MUST NOT read out the answer options, but select the option mentioned which is closest]</i>                                     |     |
|     | A. Via an online search                                                                                                                                                                                                                                                                                       | A.  |



|     |                                                                                                                                                                                                                                                               |     |
|-----|---------------------------------------------------------------------------------------------------------------------------------------------------------------------------------------------------------------------------------------------------------------|-----|
|     | B. Facebook                                                                                                                                                                                                                                                   | B.  |
|     | C. WhatsApp                                                                                                                                                                                                                                                   | C.  |
|     | D. YouTube                                                                                                                                                                                                                                                    | D.  |
|     | E. Twitter                                                                                                                                                                                                                                                    | E.  |
|     | F. TikTok                                                                                                                                                                                                                                                     | F.  |
|     | G. Instagram                                                                                                                                                                                                                                                  | G.  |
|     | H. Snapchat                                                                                                                                                                                                                                                   | H.  |
|     | I. Word of mouth                                                                                                                                                                                                                                              | I.  |
|     | J. Other, specify                                                                                                                                                                                                                                             | J.  |
| E22 | How confident are you that you could respond to misinformation about the COVID-19 vaccine?<br>1. Not at all confident<br>2. A little confident<br>3. Moderately confident<br>4. Very confident                                                                | [ ] |
| E23 | Apart from your basic professional training, have you had any formal training on the COVID-19 vaccination?<br>1. No<br>2. Yes                                                                                                                                 | [ ] |
| E24 | In the past year have you had a stock-out of the COVID-19 vaccines?<br>1. No<br>2. Yes<br>3. Not sure<br>4. Do not stock the COVID-19 vaccine                                                                                                                 | [ ] |
| E25 | Has delivering COVID-19 vaccination taken you away from other priorities?<br>1. Not at all<br>2. Slightly<br>3. Moderately<br>4. Very<br>5. I have not delivered the COVID-19 vaccination                                                                     | [ ] |
| E26 | Have you been treated poorly during the COVID-19 pandemic because you are a health worker?<br>1. No ( <i>skip to E28</i> )<br>2. Yes ( <i>continue to E27</i> )<br>3. Not sure ( <i>skip to E28</i> )                                                         | [ ] |
| E27 | What were the reasons for this?<br><i>[Can have more than one response. Mark (write the number 1 on all the answers mentioned by the respondent). The interviewer MUST NOT read out the answer options, but select the option mentioned which is closest]</i> |     |
|     | A. Patients angry at service closures                                                                                                                                                                                                                         | A.  |
|     | B. Patients angered by the vaccine brands offered                                                                                                                                                                                                             | B.  |
|     | C. Patients angered by request for medical exemption                                                                                                                                                                                                          | C.  |
|     | D. Patients angered by longer wait times                                                                                                                                                                                                                      | D.  |
|     | E. Patients believe I am a COVID-19 risk                                                                                                                                                                                                                      | E.  |
|     | F. Other, specify                                                                                                                                                                                                                                             | F.  |

|                                                                                                                                                                                   |                                                                                                                                                                                                                                                                                                                          |     |
|-----------------------------------------------------------------------------------------------------------------------------------------------------------------------------------|--------------------------------------------------------------------------------------------------------------------------------------------------------------------------------------------------------------------------------------------------------------------------------------------------------------------------|-----|
| E28                                                                                                                                                                               | Would you say you've experienced trauma or burnout related to the COVID-19 pandemic?<br>1. No ( <i>skip to E30</i> )<br>2. Yes ( <i>continue to E29</i> )<br>3. Not sure ( <i>skip to E30</i> )                                                                                                                          | [ ] |
| E29                                                                                                                                                                               | What are the main reasons you have felt trauma or burnout in your job related to COVID-19?<br><i>[Can have more than one response. Mark (write the number 1 on all the answers mentioned by the respondent). The interviewer MUST NOT read out the answer options, but select the option mentioned which is closest]</i> |     |
|                                                                                                                                                                                   | A. Shifting work duties                                                                                                                                                                                                                                                                                                  | A.  |
|                                                                                                                                                                                   | B. Changes in service delivery                                                                                                                                                                                                                                                                                           | B.  |
|                                                                                                                                                                                   | C. Long work hours                                                                                                                                                                                                                                                                                                       | C.  |
|                                                                                                                                                                                   | D. Patient distress                                                                                                                                                                                                                                                                                                      | D.  |
|                                                                                                                                                                                   | E. Use of PPE                                                                                                                                                                                                                                                                                                            | E.  |
|                                                                                                                                                                                   | F. Lack of access to PPE                                                                                                                                                                                                                                                                                                 | F.  |
|                                                                                                                                                                                   | G. Fear of illness                                                                                                                                                                                                                                                                                                       | G.  |
|                                                                                                                                                                                   | H. Fear of making family ill                                                                                                                                                                                                                                                                                             | H.  |
|                                                                                                                                                                                   | I. Training requirements                                                                                                                                                                                                                                                                                                 | I.  |
|                                                                                                                                                                                   | J. Other, specify                                                                                                                                                                                                                                                                                                        | J.  |
| E30                                                                                                                                                                               | Do you feel like your job has increased risk of exposure to COVID-19?<br>1. No<br>2. Yes                                                                                                                                                                                                                                 | [ ] |
| E31                                                                                                                                                                               | How much has your mental/emotional health been worsened by the COVID-19 pandemic?<br>1. Not at all<br>2. Slightly<br>3. Moderately<br>4. Very<br>5. Extremely                                                                                                                                                            | [ ] |
| <b>Section 4: Self-efficacy</b>                                                                                                                                                   |                                                                                                                                                                                                                                                                                                                          |     |
| <i>Now I will ask you some questions, each with four responses and would like to think about how true these are in regard to your current role. (Use Option Card/Kartu Bantu)</i> |                                                                                                                                                                                                                                                                                                                          |     |
| F1                                                                                                                                                                                | I can always manage to solve difficult problems if I try hard enough<br>1. Not true at all<br>2. Hardly true<br>3. Moderately true<br>4. Exactly true                                                                                                                                                                    | [ ] |
| F2                                                                                                                                                                                | If someone opposes me, I can find the means and ways to get what I want.<br>1. Not true at all<br>2. Hardly true<br>3. Moderately true<br>4. Exactly true                                                                                                                                                                | [ ] |
| F3                                                                                                                                                                                | It is easy for me to stick to my aims and accomplish my goals.<br>1. Not true at all                                                                                                                                                                                                                                     | [ ] |

|     |                                                                                                                                                                                   |     |
|-----|-----------------------------------------------------------------------------------------------------------------------------------------------------------------------------------|-----|
|     | <p>2. Hardly true<br/>3. Moderately true<br/>4. Exactly true</p>                                                                                                                  |     |
| F4  | <p>I am confident that I could deal efficiently with unexpected events.<br/>1. Not true at all<br/>2. Hardly true<br/>3. Moderately true<br/>4. Exactly true</p>                  | [ ] |
| F5  | <p>Thanks to my resourcefulness, I know how to handle unforeseen situations.<br/>1. Not true at all<br/>2. Hardly true<br/>3. Moderately true<br/>4. Exactly true</p>             | [ ] |
| F6  | <p>I can solve most problems if I invest the necessary effort.<br/>1. Not true at all<br/>2. Hardly true<br/>3. Moderately true<br/>4. Exactly true</p>                           | [ ] |
| F7  | <p>I can remain calm when facing difficulties because I can rely on my coping abilities.<br/>1. Not true at all<br/>2. Hardly true<br/>3. Moderately true<br/>4. Exactly true</p> | [ ] |
| F8  | <p>When I am confronted with a problem, I can usually find several solutions.<br/>1. Not true at all<br/>2. Hardly true<br/>3. Moderately true<br/>4. Exactly true</p>            | [ ] |
| F9  | <p>If I am in trouble, I can usually think of a solution.<br/>1. Not true at all<br/>2. Hardly true<br/>3. Moderately true<br/>4. Exactly true</p>                                | [ ] |
| F10 | <p>I can usually handle whatever comes my way.<br/>1. Not true at all<br/>2. Hardly true<br/>3. Moderately true<br/>4. Exactly true</p>                                           | [ ] |
